# Supplementary material for: Identification and validation of PSMB7 as a novel biomarker for prognosis and immune infiltrates of lung adenocarcinoma
Source: PeerJ journal article supplement (doi:10.7717/peerj.19958), 2025-08-29
Supplement: Raw_data.zip [file MIQE_checklist .xlsx]

## Sheet: Sheet1
ITEM TO CHECK	IMPORTANCE	CHECKLIST
EXPERIMENTAL DESIGN
Definition of experimental and control groups	E	line 81-83
Number within each group	E	line 82
Assay carried out by core lab or investigator's lab?	D	core lab
Acknowledgement of authors' contributions	D	Yan Chen/Xin Ran
SAMPLE
Description	E	line 81-88
Volume/mass of sample processed	D	2*2*0.5cm
Microdissection or macrodissection	E	macrodissection
Processing procedure	E	line 84-85
If frozen - how and how quickly?	E	NA
If fixed - with what, how quickly?	E	line 85
Sample storage conditions and duration (especially for FFPE samples)	E	Store in a dark, sealed container at room temperature below 25°C.
NUCLEIC ACID EXTRACTION
Procedure and/or instrumentation	E	line 97-121
Name of kit and details of any modifications	E	line 97-103
Source of additional reagents used	D
Details of DNase or RNAse treatment	E	Extracted RNA was treated with DNase I (Thermo Fisher) at 37°C for 30 min to remove genomic DNA contamination, RNase inhibitor (0.5 U/μL) was added to cDNA synthesis reactions.
Contamination assessment (DNA or RNA)	E	line 100-101;line 109-112;
Nucleic acid quantification	E	line 97-113
Instrument and method	E	line 99
Purity (A260/A280)	D	line 101
Yield	D	line 101-102
RNA integrity method/instrument	E	line 109-113；line 119-121
RIN/RQI or Cq of 3' and 5' transcripts	E	NA
Electrophoresis traces	D
Inhibition testing (Cq dilutions, spike or other)	E	line 110-113；line 119-120
REVERSE TRANSCRIPTION
Complete reaction conditions	E	line 101-121
Amount of RNA and reaction volume	E	line 102
Priming oligonucleotide (if using GSP) and concentration	E	line 103-108
Reverse transcriptase and concentration	E	line 102-103
Temperature and time	E	line 115-117
Manufacturer of reagents and catalogue numbers	D	line 98-100;line 103;line 115
Cqs with and without RT	D*
Storage conditions of cDNA	D
qPCR TARGET INFORMATION
If multiplex, efficiency and LOD of each assay.	E	NA
Sequence accession number	E	2796.4
Location of amplicon	D
Amplicon length	E	NA
In silico specificity screen (BLAST, etc)	E	NA
Pseudogenes, retropseudogenes or other homologs?	D
Sequence alignment	D
Secondary structure analysis of amplicon	D
Location of each primer by exon or intron (if applicable)	E	NA
What splice variants are targeted?	E	NA
qPCR OLIGONUCLEOTIDES
Primer sequences	E	line 106-108
RTPrimerDB Identification Number	D
Probe sequences	D**
Location and identity of any modifications	E	NA
Manufacturer of oligonucleotides	D	line 104
Purification method	D	line 105
qPCR PROTOCOL
Complete reaction conditions	E	line 109-121
Reaction volume and amount of cDNA/DNA	E	line 102
Primer, (probe), Mg++ and dNTP concentrations	E	NA
Polymerase identity and concentration	E	line 102
Buffer/kit identity and manufacturer	E	line 103
Exact chemical constitution of the buffer	D
Additives (SYBR Green I, DMSO, etc.)	E	SYBR Green I
Manufacturer of plates/tubes and catalog number	D
Complete thermocycling parameters	E	line 115-117
Reaction setup (manual/robotic)	D
Manufacturer of qPCR instrument	E	line 114-115
qPCR VALIDATION
Evidence of optimisation (from gradients)	D
Specificity (gel, sequence, melt, or digest)	E	line 109-110
For SYBR Green I, Cq of the NTC	E	line 110
Standard curves with slope and y-intercept	E	line 112-113
PCR efficiency calculated from slope	E	line 112
Confidence interval for PCR efficiency or standard error	D
r2 of standard curve	E	line 112-113
Linear dynamic range	E	line 111
Cq variation at lower limit	E	line 119-120
Confidence intervals throughout range	D	line 112-113
Evidence for limit of detection	E	NA
If multiplex, efficiency and LOD of each assay.	E	NA
DATA ANALYSIS
qPCR analysis program (source, version)	E	line 114
Cq method determination	E	line 119
Outlier identification and disposition	E	line 119-120
Results of NTCs	E	line 110
Justification of number and choice of reference genes	E	line 118
Description of normalisation method	E	line 118
Number and concordance of biological replicates	D	line 120-121
Number and stage (RT or qPCR) of technical replicates	E	line 119-120
Repeatability (intra-assay variation)	E	line 119-120
Reproducibility (inter-assay variation, %CV)	D	line 120-121
Power analysis	D
Statistical methods for result significance	E	NA
Software (source, version)	E	line 114
Cq or raw data submission using RDML	D
Table 1. MIQE checklist for authors, reviewers and editors. All essential information (E) must be submitted with the manuscript. Desirable
information (D) should be submitted if available. If using primers obtained from RTPrimerDB, information on qPCR target, oligonucleotides,
protocols and validation is available from that source.
*: Assessing the absence of DNA using a no RT assay is essential when first extracting RNA. Once the sample has been validated as
RDNA-free, inclusion of a no-RT control is desirable, but no longer essential.
**: Disclosure of the probe sequence is highly desirable and strongly encouraged. However, since not all commercial pre-designed assay
vendors provide this information, it cannot be an essential requirement. Use of such assays is advised against.
