# Supplementary material for: Identification and validation of PSMB7 as a novel biomarker for prognosis and immune infiltrates of lung adenocarcinoma
Source: PeerJ journal article supplement (doi:10.7717/peerj.19958), 2025-08-29
Supplement: Table_S1.xlsx [file Table_S1.xlsx]

## Sheet:  The characteris of GC
LUAD	GENDER	age	diagnose	Pairs adjacent tissues
T1	male	72	Low-differentiated infiltrating adenocarcinoma	N1	2515830
T2	female	59	Moderately differentiated infiltrating adenocarcinoma	N2	2515833
T3	female	70	Low-differentiated infiltrating adenocarcinoma	N3	2516291
T4	male	66	Low-differentiated infiltrating adenocarcinoma	N4	2516443
T5	female	57	Moderately differentiated infiltrating adenocarcinoma	N5	2516658
T6	male	59	Low-differentiated infiltrating adenocarcinoma	N6	2516837
T7	female	76	Moderately differentiated infiltrating adenocarcinoma	N7	2516904
T8	female	74	Low-differentiated infiltrating adenocarcinoma	N8	2516912
T9	male	79	Low-differentiated infiltrating adenocarcinoma	N9	2517256
T10	female	61	Moderately differentiated infiltrating adenocarcinoma	N10	2517677
T11	male	71	Low-differentiated infiltrating adenocarcinoma	N11	2517984
T12	female	74	Highly differentiated infiltrative adenocarcinoma	N12	2518313
T13	female	55	Moderately differentiated infiltrating adenocarcinoma	N13	2518315
T14	female	72	Low-differentiated infiltrating adenocarcinoma	N14	2518318
T15	female	54	Low-differentiated infiltrating adenocarcinoma	N15	2518384

## Sheet: sample source
NO.	NAME	GENDER	age	ID	diagnose
WA1		female	61		Moderately differentiated adenocarcinoma of gastric horn
WA2		male	53		Gastric Angle - antrum - superficial poorly differentiated adenocarcinoma of gastric body surface
WA3		female	54		Gastric adenocarcinoma
WA4		female	75		Early gastric (0-IIb) moderately differentiated tubular adenocarcinoma, invading the mucous muscle layer
WA6		male	65		Antrum carcinoma
WA7		female	51		Antral adenocarcinoma with multiple abdominal metastases (cT4b)
WA10		male	56		Highly differentiated tubular adenocarcinoma of posterior wall of stomach body
WA11		male	40		Ulcerated moderately differentiated adenocarcinoma in the lateral curvature of gastric antrum
WA13		male	63		Early gastric poorly differentiated adenocarcinoma (0-Ⅱc type), partly sig-ring cell carcinoma (20%),
WA14		male	65		Gastric ulcerative moderately differentiated tubular adenocarcinoma
WA20		male	63		Early gastric poorly differentiated adenocarcinoma (0-Ⅱc type),
WA21		female	37		Low adhesion carcinoma, mostly signet-ring cell carcinoma
