# Supplementary material for: Identification and validation of PSMB7 as a novel biomarker for prognosis and immune infiltrates of lung adenocarcinoma
Source: PeerJ journal article supplement (doi:10.7717/peerj.19958), 2025-08-29
Supplement: Table_S3.xlsx [file Table_S3.xlsx]

## Sheet: Sheet 1
ONTOLOGY	ID	Description	GeneRatio	BgRatio	pvalue	p.adjust	qvalue	geneID	Count
BP	GO:0140014	mitotic nuclear division	31/197	293/18800	2.60934e-22	7.82281e-19	6.71013e-19	BMP4/CCNB1/CDC20/CENPE/CHEK1/KIF11/KIFC1/MAD2L1/MYBL2/NEK2/AURKA/TTK/PRC1/AURKB/PTTG1/TRIP13/KIF23/DLGAP5/NDC80/TACC3/UBE2C/TPX2/NCAPH/KIF4A/UBE2S/NUSAP1/CDCA8/NCAPG/CDT1/KIF18A/KIF18B	31
BP	GO:0000280	nuclear division	35/197	446/18800	8.46851e-21	1.26943e-17	1.08887e-17	BMP4/CCNB1/CDC20/CENPE/CHEK1/KIF11/KIFC1/MAD2L1/MYBL2/NEK2/AURKA/TOP2A/TTK/PRC1/CCNB2/AURKB/PTTG1/TRIP13/KIF23/DLGAP5/NDC80/TACC3/RAD51AP1/UBE2C/TPX2/NCAPH/KIF4A/UBE2S/NUSAP1/CDCA8/NCAPG/CDT1/KIF18A/KIF18B/ASPM	35
BP	GO:0000070	mitotic sister chromatid segregation	24/197	171/18800	2.2624e-20	1.82613e-17	1.56639e-17	CCNB1/CDC20/CENPE/KIFC1/MAD2L1/NEK2/TTK/PRC1/AURKB/PTTG1/TRIP13/KIF23/DLGAP5/NDC80/TACC3/UBE2C/NCAPH/KIF4A/NUSAP1/CDCA8/NCAPG/CDT1/KIF18A/KIF18B	24
BP	GO:0048285	organelle fission	36/197	493/18800	2.43646e-20	1.82613e-17	1.56639e-17	BMP4/CCNB1/CDC20/CENPE/CHEK1/KIF11/KIFC1/MAD2L1/MAPT/MYBL2/NEK2/AURKA/TOP2A/TTK/PRC1/CCNB2/AURKB/PTTG1/TRIP13/KIF23/DLGAP5/NDC80/TACC3/RAD51AP1/UBE2C/TPX2/NCAPH/KIF4A/UBE2S/NUSAP1/CDCA8/NCAPG/CDT1/KIF18A/KIF18B/ASPM	36
BP	GO:0000819	sister chromatid segregation	25/197	205/18800	1.17684e-19	7.05635e-17	6.05269e-17	CCNB1/CDC20/CENPE/KIFC1/MAD2L1/NEK2/TOP2A/TTK/PRC1/AURKB/PTTG1/TRIP13/KIF23/DLGAP5/NDC80/TACC3/UBE2C/NCAPH/KIF4A/NUSAP1/CDCA8/NCAPG/CDT1/KIF18A/KIF18B	25
BP	GO:0007059	chromosome segregation	28/197	348/18800	4.74837e-17	2.3726e-14	2.03514e-14	CCNB1/CDC20/CENPE/KIFC1/MAD2L1/NEK2/TOP2A/TTK/PRC1/AURKB/PTTG1/TRIP13/KIF23/DLGAP5/NDC80/TACC3/UBE2C/NCAPH/KIF4A/NUSAP1/CDCA8/HJURP/CENPN/NCAPG/CDT1/KIF18A/KIF18B/SKA1	28
BP	GO:1902850	microtubule cytoskeleton organization involved in mitosis	20/197	151/18800	1.21608e-16	5.20829e-14	4.46749e-14	CCNB1/CDC20/CENPE/KIF11/KIFC1/MAD2L1/MYBL2/NEK2/PAX6/AURKA/TTK/PRC1/AURKB/KIF23/DLGAP5/NDC80/TACC3/TPX2/KIF4A/NUSAP1	20
BP	GO:0098813	nuclear chromosome segregation	25/197	287/18800	3.9927e-16	1.49626e-13	1.28344e-13	CCNB1/CDC20/CENPE/KIFC1/MAD2L1/NEK2/TOP2A/TTK/PRC1/AURKB/PTTG1/TRIP13/KIF23/DLGAP5/NDC80/TACC3/UBE2C/NCAPH/KIF4A/NUSAP1/CDCA8/NCAPG/CDT1/KIF18A/KIF18B	25
BP	GO:0007052	mitotic spindle organization	17/197	124/18800	1.42882e-14	4.75955e-12	4.08258e-12	CCNB1/CDC20/CENPE/KIF11/KIFC1/MYBL2/NEK2/AURKA/TTK/PRC1/AURKB/KIF23/DLGAP5/NDC80/TACC3/TPX2/KIF4A	17
BP	GO:0007051	spindle organization	19/197	188/18800	1.12295e-13	3.36661e-11	2.88776e-11	CCNB1/CDC20/CENPE/KIF11/KIFC1/MYBL2/NEK2/AURKA/TTK/PRC1/CCNB2/AURKB/KIF23/DLGAP5/NDC80/TACC3/TPX2/KIF4A/ASPM	19
BP	GO:0051304	chromosome separation	14/197	97/18800	1.57891e-12	4.30326e-10	3.69118e-10	CCNB1/CENPE/MAD2L1/TOP2A/TTK/AURKB/PTTG1/TRIP13/DLGAP5/NDC80/TACC3/UBE2C/NCAPH/CDT1	14
BP	GO:0010965	regulation of mitotic sister chromatid separation	12/197	65/18800	3.10273e-12	7.75165e-10	6.64909e-10	CCNB1/CENPE/MAD2L1/TTK/AURKB/PTTG1/TRIP13/DLGAP5/NDC80/TACC3/UBE2C/CDT1	12
BP	GO:0051306	mitotic sister chromatid separation	12/197	68/18800	5.45802e-12	1.2587e-09	1.07967e-09	CCNB1/CENPE/MAD2L1/TTK/AURKB/PTTG1/TRIP13/DLGAP5/NDC80/TACC3/UBE2C/CDT1	12
BP	GO:0033045	regulation of sister chromatid segregation	12/197	72/18800	1.11023e-11	2.21897e-09	1.90336e-09	CCNB1/CENPE/MAD2L1/TTK/AURKB/PTTG1/TRIP13/DLGAP5/NDC80/TACC3/UBE2C/CDT1	12
BP	GO:1905818	regulation of chromosome separation	12/197	72/18800	1.11023e-11	2.21897e-09	1.90336e-09	CCNB1/CENPE/MAD2L1/TTK/AURKB/PTTG1/TRIP13/DLGAP5/NDC80/TACC3/UBE2C/CDT1	12
BP	GO:0051783	regulation of nuclear division	15/197	139/18800	1.8473e-11	3.46137e-09	2.96904e-09	BMP4/CCNB1/CDC20/CHEK1/MAD2L1/NEK2/AURKA/TTK/AURKB/TRIP13/DLGAP5/NDC80/RAD51AP1/NUSAP1/CDT1	15
BP	GO:0051225	spindle assembly	14/197	121/18800	3.43216e-11	6.05271e-09	5.1918e-09	CDC20/KIF11/KIFC1/MYBL2/NEK2/AURKA/PRC1/CCNB2/AURKB/KIF23/NDC80/TPX2/KIF4A/ASPM	14
BP	GO:0007091	metaphase/anaphase transition of mitotic cell cycle	11/197	62/18800	4.03154e-11	6.71475e-09	5.75968e-09	CCNB1/CENPE/MAD2L1/TTK/AURKB/TRIP13/DLGAP5/NDC80/TACC3/UBE2C/CDT1	11
BP	GO:0044784	metaphase/anaphase transition of cell cycle	11/197	65/18800	6.90821e-11	1.09004e-08	9.35001e-09	CCNB1/CENPE/MAD2L1/TTK/AURKB/TRIP13/DLGAP5/NDC80/TACC3/UBE2C/CDT1	11
BP	GO:0033044	regulation of chromosome organization	17/197	212/18800	9.52469e-11	1.42775e-08	1.22467e-08	CCNB1/CENPE/MAD2L1/MAPT/NEK2/TOP2A/TTK/AURKB/PTTG1/TRIP13/DLGAP5/NDC80/TACC3/UBE2C/NCAPH/NCAPG/CDT1	17
BP	GO:0007088	regulation of mitotic nuclear division	13/197	111/18800	1.50953e-10	2.15504e-08	1.84851e-08	BMP4/CCNB1/CHEK1/MAD2L1/NEK2/AURKA/TTK/AURKB/TRIP13/DLGAP5/NDC80/NUSAP1/CDT1	13
BP	GO:0051983	regulation of chromosome segregation	12/197	91/18800	1.91702e-10	2.61238e-08	2.2408e-08	CCNB1/CENPE/MAD2L1/TTK/AURKB/PTTG1/TRIP13/DLGAP5/NDC80/TACC3/UBE2C/CDT1	12
BP	GO:0030071	regulation of mitotic metaphase/anaphase transition	10/197	60/18800	6.07307e-10	7.91612e-08	6.79017e-08	CCNB1/CENPE/MAD2L1/TTK/AURKB/TRIP13/DLGAP5/NDC80/UBE2C/CDT1	10
BP	GO:1902099	regulation of metaphase/anaphase transition of cell cycle	10/197	63/18800	1.00184e-09	1.25146e-07	1.07346e-07	CCNB1/CENPE/MAD2L1/TTK/AURKB/TRIP13/DLGAP5/NDC80/UBE2C/CDT1	10
BP	GO:0044772	mitotic cell cycle phase transition	22/197	440/18800	1.44618e-09	1.72356e-07	1.47841e-07	CCNA2/CCNB1/CDK1/CENPE/CHEK1/EZH2/FOXM1/MAD2L1/RRM2/AURKA/TTK/CCNB2/AURKB/TRIP13/DLGAP5/MELK/NDC80/TACC3/UBE2C/UBE2S/DTL/CDT1	22
BP	GO:0045839	negative regulation of mitotic nuclear division	9/197	48/18800	1.49475e-09	1.72356e-07	1.47841e-07	BMP4/CCNB1/CHEK1/MAD2L1/TTK/AURKB/TRIP13/NDC80/CDT1	9
BP	GO:0090307	mitotic spindle assembly	10/197	69/18800	2.52422e-09	2.80281e-07	2.40416e-07	CDC20/KIF11/KIFC1/MYBL2/NEK2/PRC1/AURKB/KIF23/TPX2/KIF4A	10
BP	GO:0051784	negative regulation of nuclear division	9/197	55/18800	5.32001e-09	5.69621e-07	4.88601e-07	BMP4/CCNB1/CHEK1/MAD2L1/TTK/AURKB/TRIP13/NDC80/CDT1	9
BP	GO:0090068	positive regulation of cell cycle process	16/197	247/18800	7.71404e-09	7.97472e-07	6.84043e-07	CCNB1/CDK1/EZH2/MAD2L1/RRM2/AURKA/AURKB/KIF23/DLGAP5/NDC80/RAD51AP1/UBE2C/NUSAP1/DTL/E2F8/CDT1	16
BP	GO:0045787	positive regulation of cell cycle	18/197	329/18800	1.229e-08	1.21326e-06	1.04069e-06	CCNB1/CDK1/CHEK1/EZH2/FOXA1/MAD2L1/RRM2/AURKA/AURKB/KIF23/DLGAP5/NDC80/RAD51AP1/UBE2C/NUSAP1/DTL/E2F8/CDT1	18
BP	GO:0033046	negative regulation of sister chromatid segregation	8/197	43/18800	1.33548e-08	1.21326e-06	1.04069e-06	CCNB1/MAD2L1/TTK/AURKB/PTTG1/TRIP13/NDC80/CDT1	8
BP	GO:0033048	negative regulation of mitotic sister chromatid segregation	8/197	43/18800	1.33548e-08	1.21326e-06	1.04069e-06	CCNB1/MAD2L1/TTK/AURKB/PTTG1/TRIP13/NDC80/CDT1	8
BP	GO:2000816	negative regulation of mitotic sister chromatid separation	8/197	43/18800	1.33548e-08	1.21326e-06	1.04069e-06	CCNB1/MAD2L1/TTK/AURKB/PTTG1/TRIP13/NDC80/CDT1	8
BP	GO:0140694	non-membrane-bounded organelle assembly	19/197	379/18800	1.94877e-08	1.62385e-06	1.39288e-06	CDC20/CENPE/KIF11/KIFC1/MAPT/MYBL2/MYH11/NEK2/AURKA/PRC1/CCNB2/AURKB/KIF23/DLGAP5/NDC80/TPX2/KIF4A/CENPN/ASPM	19
BP	GO:0051985	negative regulation of chromosome segregation	8/197	45/18800	1.94992e-08	1.62385e-06	1.39288e-06	CCNB1/MAD2L1/TTK/AURKB/PTTG1/TRIP13/NDC80/CDT1	8
BP	GO:1905819	negative regulation of chromosome separation	8/197	45/18800	1.94992e-08	1.62385e-06	1.39288e-06	CCNB1/MAD2L1/TTK/AURKB/PTTG1/TRIP13/NDC80/CDT1	8
BP	GO:0033047	regulation of mitotic sister chromatid segregation	8/197	46/18800	2.33938e-08	1.89553e-06	1.62592e-06	CCNB1/MAD2L1/TTK/AURKB/PTTG1/TRIP13/NDC80/CDT1	8
BP	GO:0007143	female meiotic nuclear division	7/197	33/18800	4.22916e-08	3.33658e-06	2.862e-06	AURKA/TOP2A/TTK/CCNB2/TRIP13/NDC80/NCAPH	7
BP	GO:0007080	mitotic metaphase plate congression	8/197	51/18800	5.45888e-08	4.19634e-06	3.59947e-06	CCNB1/CENPE/KIFC1/AURKB/NDC80/CDCA8/CDT1/KIF18A	8
BP	GO:0007094	mitotic spindle assembly checkpoint signaling	7/197	38/18800	1.19521e-07	8.50172e-06	7.29248e-06	CCNB1/MAD2L1/TTK/AURKB/TRIP13/NDC80/CDT1	7
BP	GO:0071173	spindle assembly checkpoint signaling	7/197	38/18800	1.19521e-07	8.50172e-06	7.29248e-06	CCNB1/MAD2L1/TTK/AURKB/TRIP13/NDC80/CDT1	7
BP	GO:0071174	mitotic spindle checkpoint signaling	7/197	38/18800	1.19521e-07	8.50172e-06	7.29248e-06	CCNB1/MAD2L1/TTK/AURKB/TRIP13/NDC80/CDT1	7
BP	GO:0010948	negative regulation of cell cycle process	16/197	301/18800	1.21939e-07	8.50172e-06	7.29248e-06	BMP4/CCNB1/CDK1/CHEK1/EZH2/MAD2L1/NEK2/TTK/CDC45/AURKB/PTTG1/TRIP13/NDC80/DTL/E2F8/CDT1	16
BP	GO:0061844	antimicrobial humoral immune response mediated by antimicrobial peptide	9/197	79/18800	1.38681e-07	9.4492e-06	8.10519e-06	CAMP/CXCL10/CXCL9/S100A7/S100A9/CXCL11/CXCL14/CXCL13/GNLY	9
BP	GO:0031577	spindle checkpoint signaling	7/197	39/18800	1.44381e-07	9.61901e-06	8.25084e-06	CCNB1/MAD2L1/TTK/AURKB/TRIP13/NDC80/CDT1	7
BP	GO:0007346	regulation of mitotic cell cycle	20/197	478/18800	1.58441e-07	1.03262e-05	8.85747e-06	BMP4/CCNB1/CDK1/CENPE/CHEK1/EZH2/FOXA1/MAD2L1/NEK2/RRM2/AURKA/TTK/AURKB/TRIP13/DLGAP5/NDC80/UBE2C/NUSAP1/DTL/CDT1	20
BP	GO:0051303	establishment of chromosome localization	9/197	81/18800	1.72652e-07	1.08343e-05	9.29328e-06	CCNB1/CENPE/KIFC1/AURKB/DLGAP5/NDC80/CDCA8/CDT1/KIF18A	9
BP	GO:0045841	negative regulation of mitotic metaphase/anaphase transition	7/197	40/18800	1.73464e-07	1.08343e-05	9.29328e-06	CCNB1/MAD2L1/TTK/AURKB/TRIP13/NDC80/CDT1	7
BP	GO:0050000	chromosome localization	9/197	83/18800	2.13639e-07	1.30712e-05	1.1212e-05	CCNB1/CENPE/KIFC1/AURKB/DLGAP5/NDC80/CDCA8/CDT1/KIF18A	9
BP	GO:1902100	negative regulation of metaphase/anaphase transition of cell cycle	7/197	42/18800	2.46606e-07	1.47865e-05	1.26833e-05	CCNB1/MAD2L1/TTK/AURKB/TRIP13/NDC80/CDT1	7
BP	GO:1901990	regulation of mitotic cell cycle phase transition	16/197	321/18800	2.91668e-07	1.71455e-05	1.47068e-05	CCNB1/CDK1/CENPE/CHEK1/EZH2/MAD2L1/RRM2/AURKA/TTK/AURKB/TRIP13/DLGAP5/NDC80/UBE2C/DTL/CDT1	16
BP	GO:0051310	metaphase plate congression	8/197	65/18800	3.81751e-07	2.20094e-05	1.88789e-05	CCNB1/CENPE/KIFC1/AURKB/NDC80/CDCA8/CDT1/KIF18A	8
BP	GO:2001251	negative regulation of chromosome organization	9/197	89/18800	3.91391e-07	2.21394e-05	1.89904e-05	CCNB1/MAD2L1/TOP2A/TTK/AURKB/PTTG1/TRIP13/NDC80/CDT1	9
BP	GO:0140013	meiotic nuclear division	12/197	188/18800	7.13452e-07	3.93851e-05	3.37832e-05	CDC20/AURKA/TOP2A/TTK/CCNB2/PTTG1/TRIP13/NDC80/RAD51AP1/NCAPH/KIF18A/ASPM	12
BP	GO:0045786	negative regulation of cell cycle	17/197	387/18800	7.2293e-07	3.93851e-05	3.37832e-05	BMP4/CCNB1/CDK1/CHEK1/EZH2/GATA3/MAD2L1/NEK2/TTK/CDC45/AURKB/PTTG1/TRIP13/NDC80/DTL/E2F8/CDT1	17
BP	GO:0044839	cell cycle G2/M phase transition	11/197	155/18800	7.35679e-07	3.93851e-05	3.37832e-05	CCNA2/CCNB1/CDK1/CHEK1/FOXM1/AURKA/CCNB2/AURKB/MELK/NDC80/DTL	11
BP	GO:0007093	mitotic cell cycle checkpoint signaling	10/197	130/18800	1.13782e-06	5.98454e-05	5.13333e-05	CCNB1/CDK1/CHEK1/MAD2L1/TTK/AURKB/TRIP13/NDC80/DTL/CDT1	10
BP	GO:0034501	protein localization to kinetochore	5/197	19/18800	1.23922e-06	6.29694e-05	5.4013e-05	CDK1/TTK/AURKB/NDC80/CDT1	5
BP	GO:1903083	protein localization to condensed chromosome	5/197	19/18800	1.23922e-06	6.29694e-05	5.4013e-05	CDK1/TTK/AURKB/NDC80/CDT1	5
BP	GO:0006260	DNA replication	14/197	280/18800	1.59104e-06	7.94991e-05	6.81915e-05	CCNA2/CDK1/CHEK1/DACH1/MCM5/RRM2/CHAF1B/CDC45/GINS1/DTL/GINS2/MCM10/E2F8/CDT1	14
BP	GO:0000075	cell cycle checkpoint signaling	11/197	170/18800	1.83235e-06	9.00554e-05	7.72464e-05	CCNB1/CDK1/CHEK1/MAD2L1/TTK/CDC45/AURKB/TRIP13/NDC80/DTL/CDT1	11
BP	GO:1901987	regulation of cell cycle phase transition	17/197	415/18800	1.88013e-06	9.09134e-05	7.79823e-05	CCNB1/CDK1/CENPE/CHEK1/EZH2/MAD2L1/RRM2/AURKA/TTK/CDC45/AURKB/TRIP13/DLGAP5/NDC80/UBE2C/DTL/CDT1	17
BP	GO:1903046	meiotic cell cycle process	12/197	207/18800	1.9702e-06	9.37565e-05	8.0421e-05	CDC20/AURKA/TOP2A/TTK/CCNB2/PTTG1/TRIP13/NDC80/RAD51AP1/NCAPH/KIF18A/ASPM	12
BP	GO:0008608	attachment of spindle microtubules to kinetochore	6/197	37/18800	2.17599e-06	0.000101931	8.74332e-05	CCNB1/CENPE/NEK2/AURKB/NDC80/CDT1	6
BP	GO:0051231	spindle elongation	4/197	10/18800	2.3378e-06	0.000107827	9.24899e-05	PRC1/AURKB/KIF23/KIF4A	4
BP	GO:0051383	kinetochore organization	5/197	23/18800	3.46587e-06	0.000157435	0.000135042	CENPE/DLGAP5/NDC80/CENPN/CDT1	5
BP	GO:1901991	negative regulation of mitotic cell cycle phase transition	11/197	183/18800	3.75109e-06	0.000167847	0.000143974	CCNB1/CDK1/CHEK1/EZH2/MAD2L1/TTK/AURKB/TRIP13/NDC80/DTL/CDT1	11
BP	GO:0070098	chemokine-mediated signaling pathway	8/197	89/18800	4.31056e-06	0.000190045	0.000163014	CX3CR1/ACKR1/CXCL10/CXCL9/CCL8/CCL18/CXCL11/CXCL13	8
BP	GO:0051321	meiotic cell cycle	13/197	266/18800	4.85749e-06	0.000211054	0.000181035	CDC20/NEK2/AURKA/TOP2A/TTK/CCNB2/PTTG1/TRIP13/NDC80/RAD51AP1/NCAPH/KIF18A/ASPM	13
BP	GO:0071459	protein localization to chromosome, centromeric region	5/197	25/18800	5.38e-06	0.000228885	0.000196329	CDK1/TTK/AURKB/NDC80/CDT1	5
BP	GO:0051255	spindle midzone assembly	4/197	12/18800	5.42055e-06	0.000228885	0.000196329	PRC1/AURKB/KIF23/KIF4A	4
BP	GO:0019730	antimicrobial humoral response	9/197	122/18800	5.5802e-06	0.000232353	0.000199304	CAMP/CXCL10/CXCL9/S100A7/S100A9/CXCL11/CXCL14/CXCL13/GNLY	9
BP	GO:0045930	negative regulation of mitotic cell cycle	12/197	234/18800	6.97028e-06	0.000286259	0.000245543	BMP4/CCNB1/CDK1/CHEK1/EZH2/MAD2L1/TTK/AURKB/TRIP13/NDC80/DTL/CDT1	12
BP	GO:0007144	female meiosis I	4/197	13/18800	7.76552e-06	0.000314609	0.00026986	AURKA/CCNB2/TRIP13/NDC80	4
BP	GO:1990868	response to chemokine	8/197	97/18800	8.21288e-06	0.000321743	0.00027598	CX3CR1/ACKR1/CXCL10/CXCL9/CCL8/CCL18/CXCL11/CXCL13	8
BP	GO:1990869	cellular response to chemokine	8/197	97/18800	8.21288e-06	0.000321743	0.00027598	CX3CR1/ACKR1/CXCL10/CXCL9/CCL8/CCL18/CXCL11/CXCL13	8
BP	GO:0071621	granulocyte chemotaxis	9/197	128/18800	8.26359e-06	0.000321743	0.00027598	CXCL10/CXCL9/S100A7/S100A8/S100A9/CCL8/CCL18/CXCL11/CXCL13	9
BP	GO:0007100	mitotic centrosome separation	4/197	14/18800	1.07827e-05	0.000414442	0.000355494	CHEK1/KIF11/NEK2/AURKA	4
BP	GO:0000212	meiotic spindle organization	4/197	15/18800	1.45832e-05	0.000539759	0.000462987	AURKA/CCNB2/NDC80/ASPM	4
BP	GO:0051299	centrosome separation	4/197	15/18800	1.45832e-05	0.000539759	0.000462987	CHEK1/KIF11/NEK2/AURKA	4
BP	GO:0051315	attachment of mitotic spindle microtubules to kinetochore	4/197	15/18800	1.45832e-05	0.000539759	0.000462987	CENPE/AURKB/NDC80/CDT1	4
BP	GO:0030593	neutrophil chemotaxis	8/197	106/18800	1.58165e-05	0.000578268	0.000496018	CXCL10/CXCL9/S100A8/S100A9/CCL8/CCL18/CXCL11/CXCL13	8
BP	GO:1901988	negative regulation of cell cycle phase transition	12/197	255/18800	1.65412e-05	0.000597477	0.000512495	CCNB1/CDK1/CHEK1/EZH2/MAD2L1/TTK/CDC45/AURKB/TRIP13/NDC80/DTL/CDT1	12
BP	GO:0000086	G2/M transition of mitotic cell cycle	9/197	140/18800	1.70428e-05	0.000608265	0.000521748	CCNA2/CCNB1/CDK1/CHEK1/FOXM1/AURKA/AURKB/MELK/DTL	9
BP	GO:0002237	response to molecule of bacterial origin	14/197	354/18800	2.31387e-05	0.000816114	0.000700034	CAMP/CX3CR1/HMGCS2/IDO1/CXCL10/MAOB/CXCL9/PCK1/S100A7/S100A8/S100A9/CXCL11/CXCL13/INAVA	14
BP	GO:0051656	establishment of organelle localization	15/197	404/18800	2.45863e-05	0.000833197	0.000714687	CCNB1/CENPE/KIFC1/MAD2L1/MAPT/PAX6/AURKB/DLGAP5/NDC80/TRIM58/NUSAP1/CDCA8/MLPH/CDT1/KIF18A	15
BP	GO:0002544	chronic inflammatory response	4/197	17/18800	2.50126e-05	0.000833197	0.000714687	IDO1/S100A8/S100A9/CXCL13	4
BP	GO:0090231	regulation of spindle checkpoint	4/197	17/18800	2.50126e-05	0.000833197	0.000714687	CCNB1/MAD2L1/NDC80/CDT1	4
BP	GO:0090266	regulation of mitotic cell cycle spindle assembly checkpoint	4/197	17/18800	2.50126e-05	0.000833197	0.000714687	CCNB1/MAD2L1/NDC80/CDT1	4
BP	GO:1903504	regulation of mitotic spindle checkpoint	4/197	17/18800	2.50126e-05	0.000833197	0.000714687	CCNB1/MAD2L1/NDC80/CDT1	4
BP	GO:0097529	myeloid leukocyte migration	11/197	229/18800	3.09962e-05	0.00102117	0.000875924	CX3CR1/CXCL10/CXCL9/S100A7/S100A8/S100A9/CCL8/CCL18/CXCL11/CXCL13/MMP28	11
BP	GO:0097530	granulocyte migration	9/197	154/18800	3.63122e-05	0.0011833	0.001015	CXCL10/CXCL9/S100A7/S100A8/S100A9/CCL8/CCL18/CXCL11/CXCL13	9
BP	GO:0030595	leukocyte chemotaxis	11/197	236/18800	4.0812e-05	0.00131564	0.00112851	CX3CR1/CXCL10/CXCL9/S100A7/S100A8/S100A9/CCL8/CCL18/CXCL11/CXCL13/MMP28	11
BP	GO:0007292	female gamete generation	9/197	158/18800	4.43977e-05	0.001416	0.0012146	PGR/AURKA/TOP2A/TTK/CCNB2/TRIP13/NDC80/NCAPH/ASPM	9
BP	GO:1901989	positive regulation of cell cycle phase transition	8/197	123/18800	4.64221e-05	0.00146498	0.00125661	CCNB1/CDK1/EZH2/RRM2/DLGAP5/UBE2C/DTL/CDT1	8
BP	GO:0032496	response to lipopolysaccharide	13/197	333/18800	5.19766e-05	0.00162319	0.00139231	CAMP/CX3CR1/HMGCS2/IDO1/CXCL10/MAOB/CXCL9/PCK1/S100A7/S100A8/S100A9/CXCL11/CXCL13	13
BP	GO:0048247	lymphocyte chemotaxis	6/197	64/18800	5.54944e-05	0.00171518	0.00147122	CXCL10/S100A7/CCL8/CCL18/CXCL11/CXCL13	6
BP	GO:0045931	positive regulation of mitotic cell cycle	8/197	128/18800	6.16399e-05	0.00186663	0.00160113	CCNB1/CDK1/FOXA1/RRM2/DLGAP5/UBE2C/DTL/CDT1	8
BP	GO:1990266	neutrophil migration	8/197	128/18800	6.16399e-05	0.00186663	0.00160113	CXCL10/CXCL9/S100A8/S100A9/CCL8/CCL18/CXCL11/CXCL13	8
BP	GO:0006268	DNA unwinding involved in DNA replication	4/197	22/18800	7.37849e-05	0.00221207	0.00189744	MCM5/CDC45/GINS1/GINS2	4
BP	GO:0044786	cell cycle DNA replication	5/197	43/18800	8.36469e-05	0.00248291	0.00212975	DACH1/CDC45/GINS1/E2F8/CDT1	5
BP	GO:1901992	positive regulation of mitotic cell cycle phase transition	7/197	100/18800	8.76925e-05	0.00257747	0.00221086	CCNB1/CDK1/RRM2/DLGAP5/UBE2C/DTL/CDT1	7
BP	GO:0000910	cytokinesis	9/197	174/18800	9.36509e-05	0.00272588	0.00233816	AURKA/PRC1/AURKB/KIF23/KIF20A/KIF4A/NUSAP1/CEP55/E2F8	9
BP	GO:0010639	negative regulation of organelle organization	13/197	356/18800	0.000102008	0.00294058	0.00252233	BMP4/CCNB1/CHEK1/MAD2L1/MAPT/TOP2A/TTK/AURKB/PTTG1/TRIP13/NDC80/TPX2/CDT1	13
BP	GO:0016572	histone phosphorylation	5/197	45/18800	0.000104382	0.00298035	0.00255644	CCNA2/CDK1/CHEK1/AURKA/AURKB	5
BP	GO:1904666	regulation of ubiquitin protein ligase activity	4/197	24/18800	0.000105438	0.00298212	0.00255796	CDC20/MAD2L1/UBE2C/UBE2S	4
BP	GO:0060326	cell chemotaxis	12/197	315/18800	0.000127344	0.00356802	0.00306052	CX3CR1/CXCL10/CXCL9/S100A7/S100A8/S100A9/CCL8/CCL18/CXCL11/CXCL14/CXCL13/MMP28	12
BP	GO:0006959	humoral immune response	12/197	317/18800	0.000135103	0.00375036	0.00321693	C7/CAMP/GATA3/CXCL10/MFAP4/CXCL9/S100A7/S100A9/CXCL11/CXCL14/CXCL13/GNLY	12
BP	GO:0051302	regulation of cell division	9/197	186/18800	0.000155415	0.00427462	0.00366662	PAX6/AURKA/PRC1/AURKB/KIF23/KIF20A/E2F8/KIF18B/ASPM	9
BP	GO:0030261	chromosome condensation	5/197	49/18800	0.000157486	0.00429221	0.0036817	CDK1/TOP2A/NCAPH/NUSAP1/NCAPG	5
BP	GO:1904668	positive regulation of ubiquitin protein ligase activity	3/197	11/18800	0.000175745	0.00474671	0.00407156	CDC20/UBE2C/UBE2S	3
BP	GO:0051445	regulation of meiotic cell cycle	5/197	51/18800	0.000190746	0.00510586	0.00437963	CDC20/TTK/TRIP13/RAD51AP1/ASPM	5
BP	GO:0010818	T cell chemotaxis	4/197	28/18800	0.000196616	0.00521642	0.00447446	CXCL10/S100A7/CXCL11/CXCL13	4
BP	GO:0090329	regulation of DNA-templated DNA replication	5/197	52/18800	0.000209259	0.00550314	0.0047204	DACH1/GINS1/GINS2/E2F8/CDT1	5
BP	GO:0000727	double-strand break repair via break-induced replication	3/197	12/18800	0.00023252	0.00600945	0.00515469	MCM5/CDC45/GINS2	3
BP	GO:0044771	meiotic cell cycle phase transition	3/197	12/18800	0.00023252	0.00600945	0.00515469	TTK/CCNB2/NDC80	3
BP	GO:0072676	lymphocyte migration	7/197	119/18800	0.000259686	0.00659779	0.00565935	GATA3/CXCL10/S100A7/CCL8/CCL18/CXCL11/CXCL13	7
BP	GO:2000278	regulation of DNA biosynthetic process	7/197	119/18800	0.000259686	0.00659779	0.00565935	CHEK1/DACH1/NEK2/AURKB/ADIPOQ/GINS1/GINS2	7
BP	GO:0051653	spindle localization	5/197	55/18800	0.000273076	0.00687968	0.00590115	MAD2L1/PAX6/NDC80/NUSAP1/ASPM	5
BP	GO:0006261	DNA-templated DNA replication	8/197	159/18800	0.000277299	0.00692785	0.00594246	DACH1/MCM5/CDC45/GINS1/GINS2/MCM10/E2F8/CDT1	8
BP	GO:0034508	centromere complex assembly	4/197	31/18800	0.000294822	0.00730476	0.00626577	CENPE/DLGAP5/HJURP/CENPN	4
BP	GO:0021978	telencephalon regionalization	3/197	13/18800	0.000299947	0.0073109	0.00627103	BMP4/EMX2/PAX6	3
BP	GO:0051988	regulation of attachment of spindle microtubules to kinetochore	3/197	13/18800	0.000299947	0.0073109	0.00627103	CCNB1/NEK2/AURKB	3
BP	GO:0051642	centrosome localization	4/197	32/18800	0.000334195	0.00807997	0.00693071	MAD2L1/AURKA/DLGAP5/ASPM	4
BP	GO:0032508	DNA duplex unwinding	6/197	90/18800	0.000367964	0.00882525	0.00756999	MCM5/TOP2A/CDC45/GINS1/GINS2/ERCC6L	6
BP	GO:0061842	microtubule organizing center localization	4/197	33/18800	0.000377194	0.00882951	0.00757364	MAD2L1/AURKA/DLGAP5/ASPM	4
BP	GO:0070229	negative regulation of lymphocyte apoptotic process	4/197	33/18800	0.000377194	0.00882951	0.00757364	BMP4/IDO1/PIP/AURKB	4
BP	GO:0051984	positive regulation of chromosome segregation	3/197	14/18800	0.00037881	0.00882951	0.00757364	CCNB1/AURKB/CDT1	3
BP	GO:0051785	positive regulation of nuclear division	5/197	59/18800	0.000379922	0.00882951	0.00757364	AURKA/DLGAP5/RAD51AP1/NUSAP1/CDT1	5
BP	GO:0032465	regulation of cytokinesis	6/197	91/18800	0.00039055	0.00900668	0.00772561	AURKA/PRC1/AURKB/KIF23/KIF20A/E2F8	6
BP	GO:1901976	regulation of cell cycle checkpoint	4/197	34/18800	0.000424006	0.0097036	0.0083234	CCNB1/MAD2L1/NDC80/CDT1	4
BP	GO:0034502	protein localization to chromosome	6/197	93/18800	0.000438964	0.00996981	0.00855175	CDK1/EZH2/TTK/AURKB/NDC80/CDT1	6
BP	GO:0007127	meiosis I	7/197	130/18800	0.000444675	0.0100236	0.00859788	AURKA/TOP2A/CCNB2/PTTG1/TRIP13/NDC80/RAD51AP1	7
BP	GO:0006275	regulation of DNA replication	7/197	131/18800	0.000465679	0.0104187	0.00893679	CCNA2/CDK1/DACH1/GINS1/GINS2/E2F8/CDT1	7
BP	GO:0051052	regulation of DNA metabolic process	14/197	472/18800	0.000472661	0.010467	0.00897824	CCNA2/CDK1/CHEK1/DACH1/FOXM1/GATA3/NEK2/AURKB/ADIPOQ/GINS1/RAD51AP1/GINS2/E2F8/CDT1	14
BP	GO:0040001	establishment of mitotic spindle localization	4/197	35/18800	0.000474821	0.010467	0.00897824	MAD2L1/PAX6/NDC80/NUSAP1	4
BP	GO:0032392	DNA geometric change	6/197	96/18800	0.000520224	0.0113842	0.00976495	MCM5/TOP2A/CDC45/GINS1/GINS2/ERCC6L	6
BP	GO:2000241	regulation of reproductive process	8/197	176/18800	0.000547076	0.0118574	0.0101709	BMP4/CDC20/AURKA/TTK/TRIP13/RAD51AP1/CFAP69/ASPM	8
BP	GO:0010389	regulation of G2/M transition of mitotic cell cycle	6/197	97/18800	0.000549761	0.0118574	0.0101709	CCNB1/CDK1/CHEK1/AURKA/AURKB/DTL	6
BP	GO:0051238	sequestering of metal ion	3/197	16/18800	0.000573847	0.0122885	0.0105407	S100A7/S100A8/S100A9	3
BP	GO:0061982	meiosis I cell cycle process	7/197	136/18800	0.000582883	0.0123935	0.0106307	AURKA/TOP2A/CCNB2/PTTG1/TRIP13/NDC80/RAD51AP1	7
BP	GO:0048732	gland development	13/197	431/18800	0.000643582	0.0135052	0.0115842	BMP4/CSN3/ERBB4/EZH2/GATA3/HMGCS2/FOXA1/PAX6/PCK1/PGR/AURKA/CCNB2/E2F8	13
BP	GO:0061640	cytoskeleton-dependent cytokinesis	6/197	100/18800	0.000646247	0.0135052	0.0115842	AURKB/KIF23/KIF20A/KIF4A/NUSAP1/CEP55	6
BP	GO:0006270	DNA replication initiation	4/197	38/18800	0.000653185	0.0135052	0.0115842	MCM5/CDC45/MCM10/CDT1	4
BP	GO:0033260	nuclear DNA replication	4/197	38/18800	0.000653185	0.0135052	0.0115842	DACH1/CDC45/GINS1/CDT1	4
BP	GO:0010819	regulation of T cell chemotaxis	3/197	17/18800	0.000691454	0.0141985	0.012179	CXCL10/S100A7/CXCL13	3
BP	GO:0071103	DNA conformation change	6/197	103/18800	0.000755367	0.0154054	0.0132142	MCM5/TOP2A/CDC45/GINS1/GINS2/ERCC6L	6
BP	GO:0050900	leukocyte migration	12/197	384/18800	0.000762392	0.0154436	0.013247	CX3CR1/GATA3/CXCL10/CXCL9/S100A7/S100A8/S100A9/CCL8/CCL18/CXCL11/CXCL13/MMP28	12
BP	GO:0071478	cellular response to radiation	8/197	187/18800	0.000813908	0.0161337	0.0138389	CHEK1/CRY2/GATA3/MFAP4/MMP1/AURKB/RAD51AP1/PBK	8
BP	GO:0031145	anaphase-promoting complex-dependent catabolic process	3/197	18/18800	0.000823365	0.0161337	0.0138389	CDC20/UBE2C/UBE2S	3
BP	GO:0051382	kinetochore assembly	3/197	18/18800	0.000823365	0.0161337	0.0138389	CENPE/DLGAP5/CENPN	3
BP	GO:0051782	negative regulation of cell division	3/197	18/18800	0.000823365	0.0161337	0.0138389	AURKB/E2F8/ASPM	3
BP	GO:0072189	ureter development	3/197	18/18800	0.000823365	0.0161337	0.0138389	BMP4/EMX2/GATA3	3
BP	GO:0002548	monocyte chemotaxis	5/197	70/18800	0.000837027	0.0162949	0.0139771	CX3CR1/CXCL10/S100A7/CCL8/CCL18	5
BP	GO:0000281	mitotic cytokinesis	5/197	71/18800	0.00089288	0.01727	0.0148136	KIF23/KIF20A/KIF4A/NUSAP1/CEP55	5
BP	GO:1902749	regulation of cell cycle G2/M phase transition	6/197	108/18800	0.000968287	0.0184675	0.0158407	CCNB1/CDK1/CHEK1/AURKA/AURKB/DTL	6
BP	GO:0007076	mitotic chromosome condensation	3/197	19/18800	0.000970233	0.0184675	0.0158407	NCAPH/NUSAP1/NCAPG	3
BP	GO:0007018	microtubule-based movement	12/197	395/18800	0.000973268	0.0184675	0.0158407	CENPE/KIF11/KIFC1/MAPT/KIF23/DLGAP5/KIF20A/KIF4A/TRIM58/CFAP69/KIF18A/KIF18B	12
BP	GO:0071897	DNA biosynthetic process	8/197	194/18800	0.00103225	0.0194634	0.016695	CHEK1/DACH1/NEK2/AURKB/ADIPOQ/GINS1/DTL/GINS2	8
BP	GO:0070233	negative regulation of T cell apoptotic process	3/197	20/18800	0.00113268	0.0210393	0.0180468	BMP4/IDO1/PIP	3
BP	GO:0090026	positive regulation of monocyte chemotaxis	3/197	20/18800	0.00113268	0.0210393	0.0180468	CX3CR1/CXCL10/S100A7	3
BP	GO:0045840	positive regulation of mitotic nuclear division	4/197	44/18800	0.0011439	0.0210393	0.0180468	AURKA/DLGAP5/NUSAP1/CDT1	4
BP	GO:0048286	lung alveolus development	4/197	44/18800	0.0011439	0.0210393	0.0180468	BMP4/FOXA1/MMP12/PGR	4
BP	GO:0010720	positive regulation of cell development	10/197	297/18800	0.00119722	0.0218857	0.0187728	BMP4/CX3CR1/LRP2/MAPT/PAX6/AURKA/ADIPOQ/MACF1/CHODL/ASPM	10
BP	GO:0071674	mononuclear cell migration	8/197	199/18800	0.00121513	0.0220785	0.0189382	CX3CR1/GATA3/CXCL10/S100A7/CCL8/CCL18/CXCL11/CXCL13	8
BP	GO:0032886	regulation of microtubule-based process	9/197	249/18800	0.00128578	0.0232216	0.0199186	MAPT/AURKA/TACC3/TPX2/MACF1/TRIM58/CFAP69/KIF18A/SKA1	9
BP	GO:0033762	response to glucagon	3/197	21/18800	0.00131132	0.0235409	0.0201926	CCNA2/HMGCS2/PCK1	3
BP	GO:0045927	positive regulation of growth	9/197	256/18800	0.00155675	0.0277806	0.0238292	CDK1/ERBB4/MAPT/S100A8/S100A9/AGR2/MACF1/SYT17/SLC44A4	9
BP	GO:0045471	response to ethanol	6/197	119/18800	0.00159738	0.028337	0.0243065	CDK1/GATA3/HMGCS2/MAOB/S100A8/ADIPOQ	6
BP	GO:0021871	forebrain regionalization	3/197	23/18800	0.00171944	0.0303228	0.0260099	BMP4/EMX2/PAX6	3
BP	GO:0071482	cellular response to light stimulus	6/197	121/18800	0.00173904	0.0304891	0.0261525	CHEK1/CRY2/MFAP4/MMP1/AURKB/PBK	6
BP	GO:0051293	establishment of spindle localization	4/197	50/18800	0.00184814	0.0320273	0.0274719	MAD2L1/PAX6/NDC80/NUSAP1	4
BP	GO:2000107	negative regulation of leukocyte apoptotic process	4/197	50/18800	0.00184814	0.0320273	0.0274719	BMP4/IDO1/PIP/AURKB	4
BP	GO:0051054	positive regulation of DNA metabolic process	9/197	263/18800	0.00187184	0.0322516	0.0276643	CDK1/FOXM1/NEK2/AURKB/GINS1/RAD51AP1/GINS2/E2F8/CDT1	9
BP	GO:0002052	positive regulation of neuroblast proliferation	3/197	24/18800	0.00195001	0.0334065	0.0286549	CX3CR1/PAX6/ASPM	3
BP	GO:2000179	positive regulation of neural precursor cell proliferation	4/197	51/18800	0.00198919	0.0338841	0.0290646	CX3CR1/LRP2/PAX6/ASPM	4
BP	GO:0051307	meiotic chromosome separation	3/197	25/18800	0.00219895	0.0372454	0.0319478	TOP2A/TTK/NCAPH	3
BP	GO:0050832	defense response to fungus	4/197	53/18800	0.00229331	0.0386255	0.0331316	CX3CR1/S100A8/S100A9/GNLY	4
BP	GO:0034644	cellular response to UV	5/197	88/18800	0.00232865	0.0390017	0.0334543	CHEK1/MFAP4/MMP1/AURKB/PBK	5
BP	GO:2001252	positive regulation of chromosome organization	5/197	89/18800	0.00244664	0.0404112	0.0346633	NEK2/AURKB/NCAPH/NCAPG/CDT1	5
BP	GO:0002067	glandular epithelial cell differentiation	4/197	54/18800	0.00245674	0.0404112	0.0346633	BMP4/FOXA1/PAX6/AGR2	4
BP	GO:0006968	cellular defense response	4/197	54/18800	0.00245674	0.0404112	0.0346633	CX3CR1/CXCL9/GNLY/TRAT1	4
BP	GO:1901623	regulation of lymphocyte chemotaxis	3/197	26/18800	0.00246673	0.0404112	0.0346633	CXCL10/S100A7/CXCL13	3
BP	GO:0007098	centrosome cycle	6/197	131/18800	0.00259527	0.042286	0.0362714	CDK1/CHEK1/KIF11/NEK2/AURKA/NDC80	6
BP	GO:0051438	regulation of ubiquitin-protein transferase activity	4/197	56/18800	0.0028073	0.0454934	0.0390226	CDC20/MAD2L1/UBE2C/UBE2S	4
BP	GO:0070228	regulation of lymphocyte apoptotic process	4/197	57/18800	0.00299478	0.0482707	0.0414049	BMP4/IDO1/PIP/AURKB	4
BP	GO:0010971	positive regulation of G2/M transition of mitotic cell cycle	3/197	28/18800	0.0030607	0.0488084	0.0418661	CCNB1/CDK1/DTL	3
BP	GO:0090025	regulation of monocyte chemotaxis	3/197	28/18800	0.0030607	0.0488084	0.0418661	CX3CR1/CXCL10/S100A7	3
BP	GO:0045132	meiotic chromosome segregation	5/197	96/18800	0.00339756	0.0538935	0.046228	TOP2A/TTK/PTTG1/TRIP13/NCAPH	5
BP	GO:0000132	establishment of mitotic spindle orientation	3/197	30/18800	0.0037354	0.0589408	0.0505573	MAD2L1/PAX6/NDC80	3
BP	GO:0022412	cellular process involved in reproduction in multicellular organism	11/197	406/18800	0.00379857	0.0596236	0.051143	BMP4/AURKA/TOP2A/TTK/CCNB2/TRIP13/NDC80/NCAPH/CFAP69/KIF18A/ASPM	11
BP	GO:0061351	neural precursor cell proliferation	6/197	143/18800	0.00400148	0.0624309	0.053551	CX3CR1/EMX2/LRP2/PAX6/MELK/ASPM	6
BP	GO:0010038	response to metal ion	10/197	351/18800	0.00401907	0.0624309	0.053551	AQP9/CDK1/FABP4/HMGCS2/MAOB/MAPT/NUDT1/S100A8/SYT17/CYBRD1	10
BP	GO:0010972	negative regulation of G2/M transition of mitotic cell cycle	4/197	62/18800	0.00406139	0.0627632	0.0538361	CDK1/CHEK1/AURKB/DTL	4
BP	GO:1902751	positive regulation of cell cycle G2/M phase transition	3/197	31/18800	0.00410404	0.062775	0.0538462	CCNB1/CDK1/DTL	3
BP	GO:2000406	positive regulation of T cell migration	3/197	31/18800	0.00410404	0.062775	0.0538462	CXCL10/S100A7/CXCL13	3
BP	GO:0032963	collagen metabolic process	5/197	101/18800	0.0042223	0.0642561	0.0551166	BMP4/MFAP4/MMP1/MMP12/MMP28	5
BP	GO:0031023	microtubule organizing center organization	6/197	145/18800	0.00428181	0.0648327	0.0556112	CDK1/CHEK1/KIF11/NEK2/AURKA/NDC80	6
BP	GO:0009411	response to UV	6/197	146/18800	0.00442729	0.0666984	0.0572115	CHEK1/MFAP4/MMP1/AURKB/DTL/PBK	6
BP	GO:0040020	regulation of meiotic nuclear division	3/197	32/18800	0.00449402	0.0666984	0.0572115	CDC20/TRIP13/RAD51AP1	3
BP	GO:0051443	positive regulation of ubiquitin-protein transferase activity	3/197	32/18800	0.00449402	0.0666984	0.0572115	CDC20/UBE2C/UBE2S	3
BP	GO:0090183	regulation of kidney development	3/197	32/18800	0.00449402	0.0666984	0.0572115	BMP4/GATA3/ADIPOQ	3
BP	GO:0009620	response to fungus	4/197	64/18800	0.00455159	0.0668905	0.0573763	CX3CR1/S100A8/S100A9/GNLY	4
BP	GO:1902750	negative regulation of cell cycle G2/M phase transition	4/197	64/18800	0.00455159	0.0668905	0.0573763	CDK1/CHEK1/AURKB/DTL	4
BP	GO:0014823	response to activity	4/197	65/18800	0.00481098	0.0700161	0.0600574	CDK1/CRY2/PCK1/ADIPOQ	4
BP	GO:0031100	animal organ regeneration	4/197	65/18800	0.00481098	0.0700161	0.0600574	CCNA2/CDK1/EZH2/AURKA	4
BP	GO:0071677	positive regulation of mononuclear cell migration	4/197	66/18800	0.00508012	0.0735759	0.0631108	CX3CR1/CXCL10/S100A7/CXCL13	4
BP	GO:0070232	regulation of T cell apoptotic process	3/197	34/18800	0.00533942	0.0765086	0.0656264	BMP4/IDO1/PIP	3
BP	GO:1902692	regulation of neuroblast proliferation	3/197	34/18800	0.00533942	0.0765086	0.0656264	CX3CR1/PAX6/ASPM	3
BP	GO:0072678	T cell migration	4/197	67/18800	0.00535918	0.0765086	0.0656264	CXCL10/S100A7/CXCL11/CXCL13	4
BP	GO:0003139	secondary heart field specification	2/197	11/18800	0.00564623	0.0774054	0.0663956	BMP4/LRP2	2
BP	GO:0035404	histone-serine phosphorylation	2/197	11/18800	0.00564623	0.0774054	0.0663956	AURKA/AURKB	2
BP	GO:0048251	elastic fiber assembly	2/197	11/18800	0.00564623	0.0774054	0.0663956	MFAP4/MYH11	2
BP	GO:0060433	bronchus development	2/197	11/18800	0.00564623	0.0774054	0.0663956	BMP4/AGR2	2
BP	GO:0060623	regulation of chromosome condensation	2/197	11/18800	0.00564623	0.0774054	0.0663956	NCAPH/NCAPG	2
BP	GO:1901978	positive regulation of cell cycle checkpoint	2/197	11/18800	0.00564623	0.0774054	0.0663956	MAD2L1/NDC80	2
BP	GO:2000615	regulation of histone H3-K9 acetylation	2/197	11/18800	0.00564623	0.0774054	0.0663956	CHEK1/GATA3	2
BP	GO:0065004	protein-DNA complex assembly	7/197	203/18800	0.00565436	0.0774054	0.0663956	CENPE/CHAF1B/CDC45/DLGAP5/HJURP/CENPN/CDT1	7
BP	GO:0071383	cellular response to steroid hormone stimulus	7/197	203/18800	0.00565436	0.0774054	0.0663956	BMP4/CRY2/HMGCS2/FOXA1/SCGB2A2/PCK1/PGR	7
BP	GO:0007095	mitotic G2 DNA damage checkpoint signaling	3/197	35/18800	0.00579547	0.0789765	0.0677433	CDK1/CHEK1/DTL	3
BP	GO:0048608	reproductive structure development	11/197	433/18800	0.00610533	0.0828225	0.0710422	BMP4/GATA3/FOXA1/LRP2/NUDT1/NDP/PGR/STC2/E2F8/KIF18A/ASPM	11
BP	GO:0010817	regulation of hormone levels	12/197	496/18800	0.00621997	0.0833643	0.071507	ADH1B/CRABP1/CRY2/GATA3/GRP/FOXA1/TFAP2B/SLC7A5/STC2/ADIPOQ/CORIN/MYRIP	12
BP	GO:0021532	neural tube patterning	3/197	36/18800	0.00627417	0.0833643	0.071507	BMP4/FOXA1/PAX6	3
BP	GO:0051294	establishment of spindle orientation	3/197	36/18800	0.00627417	0.0833643	0.071507	MAD2L1/PAX6/NDC80	3
BP	GO:0060428	lung epithelium development	3/197	36/18800	0.00627417	0.0833643	0.071507	BMP4/FOXA1/AGR2	3
BP	GO:0071347	cellular response to interleukin-1	5/197	111/18800	0.0062843	0.0833643	0.071507	CAMP/PCK1/CCL8/CCL18/IL1R2	5
BP	GO:0061458	reproductive system development	11/197	436/18800	0.00641801	0.0847629	0.0727066	BMP4/GATA3/FOXA1/LRP2/NUDT1/NDP/PGR/STC2/E2F8/KIF18A/ASPM	11
BP	GO:0060284	regulation of cell development	12/197	500/18800	0.00661417	0.0868111	0.0744635	BMP4/CX3CR1/EZH2/LRP2/MAPT/PAX6/AURKA/ADIPOQ/MACF1/TRIM58/CHODL/ASPM	12
BP	GO:0010992	ubiquitin recycling	2/197	12/18800	0.00672897	0.0868111	0.0744635	UBE2C/UBE2S	2
BP	GO:0033212	iron import into cell	2/197	12/18800	0.00672897	0.0868111	0.0744635	STEAP4/CYBRD1	2
BP	GO:0072015	glomerular visceral epithelial cell development	2/197	12/18800	0.00672897	0.0868111	0.0744635	BMP4/ADIPOQ	2
BP	GO:0072178	nephric duct morphogenesis	2/197	12/18800	0.00672897	0.0868111	0.0744635	BMP4/GATA3	2
BP	GO:2000279	negative regulation of DNA biosynthetic process	3/197	37/18800	0.00677578	0.0868111	0.0744635	CHEK1/DACH1/ADIPOQ	3
BP	GO:2000403	positive regulation of lymphocyte migration	3/197	37/18800	0.00677578	0.0868111	0.0744635	CXCL10/S100A7/CXCL13	3
BP	GO:0007159	leukocyte cell-cell adhesion	10/197	381/18800	0.00705591	0.0900153	0.077212	BMP4/CX3CR1/GATA3/HLA-DQA1/HLA-DQA2/IDO1/LAG3/PCK1/S100A8/S100A9	10
BP	GO:0071214	cellular response to abiotic stimulus	9/197	323/18800	0.00717134	0.0907159	0.0778129	CHEK1/CRY2/GATA3/MFAP4/MMP1/PCK1/AURKB/RAD51AP1/PBK	9
BP	GO:0104004	cellular response to environmental stimulus	9/197	323/18800	0.00717134	0.0907159	0.0778129	CHEK1/CRY2/GATA3/MFAP4/MMP1/PCK1/AURKB/RAD51AP1/PBK	9
BP	GO:2000573	positive regulation of DNA biosynthetic process	4/197	73/18800	0.00725039	0.0913306	0.0783402	NEK2/AURKB/GINS1/GINS2	4
BP	GO:0030307	positive regulation of cell growth	6/197	163/18800	0.00749707	0.0940427	0.0806665	MAPT/S100A8/S100A9/MACF1/SYT17/SLC44A4	6
BP	GO:0032506	cytokinetic process	3/197	39/18800	0.0078488	0.0950918	0.0815664	AURKB/KIF20A/CEP55	3
BP	GO:0055081	anion homeostasis	3/197	39/18800	0.0078488	0.0950918	0.0815664	CA12/TFAP2B/CYBRD1	3
BP	GO:0001833	inner cell mass cell proliferation	2/197	13/18800	0.00789788	0.0950918	0.0815664	CHEK1/GINS1	2
BP	GO:0032494	response to peptidoglycan	2/197	13/18800	0.00789788	0.0950918	0.0815664	CAMP/INAVA	2
BP	GO:0033262	regulation of nuclear cell cycle DNA replication	2/197	13/18800	0.00789788	0.0950918	0.0815664	DACH1/CDT1	2
BP	GO:0043970	histone H3-K9 acetylation	2/197	13/18800	0.00789788	0.0950918	0.0815664	CHEK1/GATA3	2
BP	GO:0070486	leukocyte aggregation	2/197	13/18800	0.00789788	0.0950918	0.0815664	S100A8/S100A9	2
BP	GO:0072310	glomerular epithelial cell development	2/197	13/18800	0.00789788	0.0950918	0.0815664	BMP4/ADIPOQ	2
BP	GO:1900262	regulation of DNA-directed DNA polymerase activity	2/197	13/18800	0.00789788	0.0950918	0.0815664	GINS1/GINS2	2
BP	GO:1900264	positive regulation of DNA-directed DNA polymerase activity	2/197	13/18800	0.00789788	0.0950918	0.0815664	GINS1/GINS2	2
BP	GO:0070227	lymphocyte apoptotic process	4/197	75/18800	0.00796703	0.0955406	0.0819513	BMP4/IDO1/PIP/AURKB	4
BP	GO:0048638	regulation of developmental growth	9/197	329/18800	0.00804269	0.0956847	0.082075	BMP4/CDK1/ERBB4/GAMT/MAPT/STC2/AGR2/MACF1/SYT17	9
BP	GO:0071222	cellular response to lipopolysaccharide	7/197	217/18800	0.00804288	0.0956847	0.082075	CAMP/CX3CR1/HMGCS2/CXCL10/CXCL9/CXCL11/CXCL13	7
BP	GO:0048545	response to steroid hormone	9/197	330/18800	0.00819543	0.0971142	0.0833012	BMP4/CRY2/HMGCS2/FOXA1/MAOB/SCGB2A2/PCK1/PGR/ADIPOQ	9
BP	GO:0051235	maintenance of location	9/197	331/18800	0.00835038	0.098037	0.0840927	CRY2/CXCL10/ITPR1/CXCL9/S100A7/S100A8/S100A9/CXCL11/ASPM	9
BP	GO:0045740	positive regulation of DNA replication	3/197	40/18800	0.00842068	0.098037	0.0840927	CDK1/E2F8/CDT1	3
BP	GO:0051281	positive regulation of release of sequestered calcium ion into cytosol	3/197	40/18800	0.00842068	0.098037	0.0840927	CXCL10/CXCL9/CXCL11	3
BP	GO:0072210	metanephric nephron development	3/197	40/18800	0.00842068	0.098037	0.0840927	BMP4/TFAP2B/ADIPOQ	3
BP	GO:0051651	maintenance of location in cell	7/197	219/18800	0.00843681	0.098037	0.0840927	CXCL10/ITPR1/CXCL9/S100A8/S100A9/CXCL11/ASPM	7
CC	GO:0005819	spindle	26/203	402/19594	9.719e-14	2.87682e-11	2.52694e-11	BIRC5/CCNB1/CDK1/CDC20/CENPE/KIF11/KIFC1/MAD2L1/NEK2/AURKA/TTK/PRC1/AURKB/KIF23/DLGAP5/KIF20A/TACC3/TPX2/KIF4A/TRAT1/NUSAP1/CDCA8/KIF18A/KIF18B/SKA1/ASPM	26
CC	GO:0072686	mitotic spindle	17/203	160/19594	8.73118e-13	1.29221e-10	1.13505e-10	CDK1/CENPE/KIF11/KIFC1/MAD2L1/AURKA/PRC1/AURKB/KIF23/TACC3/TPX2/TRAT1/NUSAP1/KIF18A/KIF18B/SKA1/ASPM	17
CC	GO:0000775	chromosome, centromeric region	19/203	227/19594	2.812e-12	2.7745e-10	2.43706e-10	BIRC5/CCNB1/CENPE/EZH2/MAD2L1/NEK2/TOP2A/TTK/AURKB/NDC80/ERCC6L/CDCA8/HJURP/CENPN/NCAPG/CENPM/CDT1/KIF18A/SKA1	19
CC	GO:0098687	chromosomal region	23/203	366/19594	5.14807e-12	3.80957e-10	3.34625e-10	BIRC5/CCNB1/CDK1/CENPE/CHEK1/EZH2/MAD2L1/MCM5/NEK2/TOP2A/TTK/AURKB/NDC80/RAD51AP1/ERCC6L/CDCA8/HJURP/CENPN/NCAPG/CENPM/CDT1/KIF18A/SKA1	23
CC	GO:0000779	condensed chromosome, centromeric region	16/203	156/19594	7.22974e-12	4.28001e-10	3.75947e-10	BIRC5/CCNB1/CENPE/MAD2L1/NEK2/TTK/AURKB/NDC80/ERCC6L/HJURP/CENPN/NCAPG/CENPM/CDT1/KIF18A/SKA1	16
CC	GO:0000776	kinetochore	15/203	146/19594	3.26203e-11	1.60927e-09	1.41355e-09	BIRC5/CCNB1/CENPE/MAD2L1/NEK2/TTK/AURKB/NDC80/ERCC6L/HJURP/CENPN/CENPM/CDT1/KIF18A/SKA1	15
CC	GO:0000793	condensed chromosome	18/203	255/19594	1.81787e-10	7.68701e-09	6.7521e-09	BIRC5/CCNB1/CENPE/CHEK1/MAD2L1/NEK2/TOP2A/TTK/AURKB/NDC80/ERCC6L/HJURP/CENPN/NCAPG/CENPM/CDT1/KIF18A/SKA1	18
CC	GO:0005876	spindle microtubule	11/203	83/19594	9.47136e-10	3.5044e-08	3.07819e-08	BIRC5/CDK1/CENPE/KIF11/AURKA/PRC1/AURKB/KIF4A/KIF18A/KIF18B/SKA1	11
CC	GO:0005874	microtubule	20/203	435/19594	2.89731e-08	9.52894e-07	8.37001e-07	BIRC5/CDK1/CENPE/KIF11/KIFC1/MAPT/NEK2/AURKA/PRC1/AURKB/KIF23/KIF20A/TPX2/MACF1/KIF4A/NUSAP1/KIF18A/KIF18B/SKA1/ASPM	20
CC	GO:0051233	spindle midzone	7/203	36/19594	7.47511e-08	2.21263e-06	1.94353e-06	CENPE/AURKA/PRC1/AURKB/CDCA8/KIF18A/KIF18B	7
CC	GO:0000922	spindle pole	12/203	169/19594	2.02552e-07	4.80075e-06	4.21688e-06	CCNB1/CDC20/KIF11/MAD2L1/NEK2/AURKA/PRC1/AURKB/DLGAP5/TACC3/TPX2/ASPM	12
CC	GO:0030496	midbody	13/203	203/19594	2.07625e-07	4.80075e-06	4.21688e-06	BIRC5/CDK1/CENPE/NEK2/AURKA/PRC1/AURKB/KIF23/KIF20A/KIF4A/CDCA8/CEP55/ASPM	13
CC	GO:1990023	mitotic spindle midzone	5/203	14/19594	2.10844e-07	4.80075e-06	4.21688e-06	CENPE/PRC1/AURKB/KIF18A/KIF18B	5
CC	GO:0005875	microtubule associated complex	11/203	160/19594	9.09442e-07	1.92282e-05	1.68896e-05	BIRC5/KIF11/KIFC1/AURKA/DNALI1/AURKB/KIF23/KIF20A/CDCA8/KIF18A/KIF18B	11
CC	GO:0062023	collagen-containing extracellular matrix	17/203	429/19594	2.56024e-06	5.05221e-05	4.43775e-05	COL16A1/COL17A1/COMP/MATN3/MFAP4/NDP/OMD/OGN/S100A7/S100A8/S100A9/CILP/ADIPOQ/ADAMDEC1/ASPN/TPSB2/MMP28	17
CC	GO:0071162	CMG complex	4/203	11/19594	3.48694e-06	6.45083e-05	5.66627e-05	MCM5/CDC45/GINS1/GINS2	4
CC	GO:0031261	DNA replication preinitiation complex	4/203	12/19594	5.18799e-06	9.03321e-05	7.93457e-05	MCM5/CDC45/GINS1/GINS2	4
CC	GO:0005871	kinesin complex	6/203	49/19594	1.10818e-05	0.000182234	0.000160071	KIF11/KIFC1/KIF23/KIF20A/KIF18A/KIF18B	6
CC	GO:0000940	outer kinetochore	3/203	12/19594	0.000224998	0.00350523	0.00307892	CCNB1/NDC80/SKA1	3
CC	GO:0045120	pronucleus	3/203	13/19594	0.000290268	0.00429596	0.00377348	CCNA2/EZH2/AURKA	3
CC	GO:0031616	spindle pole centrosome	3/203	14/19594	0.000366616	0.00516754	0.00453906	AURKA/AURKB/DLGAP5	3
CC	GO:0000228	nuclear chromosome	9/203	228/19594	0.000640807	0.00862177	0.00757317	BIRC5/CHEK1/MCM5/NEK2/TOP2A/CDC45/GINS1/GINS2/MCM10	9
CC	GO:0045171	intercellular bridge	5/203	75/19594	0.00108962	0.014023	0.0123175	PRC1/KIF20A/TPX2/CDCA8/CEP55	5
CC	GO:0005680	anaphase-promoting complex	3/203	21/19594	0.00126985	0.0156615	0.0137567	CDC20/UBE2C/UBE2S	3
CC	GO:0000307	cyclin-dependent protein kinase holoenzyme complex	4/203	49/19594	0.00164594	0.0194879	0.0171178	CCNA2/CCNB1/CDK1/CCNB2	4
CC	GO:0031528	microvillus membrane	3/203	26/19594	0.00238972	0.0272061	0.0238972	PDZK1/S100P/SLC7A5	3
CC	GO:0034451	centriolar satellite	5/203	107/19594	0.00514614	0.0563824	0.0495251	DLGAP5/TACC3/AK5/TRAT1/CEP55	5
CC	GO:0000235	astral microtubule	2/203	11/19594	0.00552395	0.0563824	0.0495251	KIF18A/KIF18B	2
CC	GO:0005818	aster	2/203	11/19594	0.00552395	0.0563824	0.0495251	KIF18A/KIF18B	2
CC	GO:0097431	mitotic spindle pole	3/203	36/19594	0.00608332	0.0600221	0.0527221	AURKA/AURKB/ASPM	3
CC	GO:0044194	cytolytic granule	2/203	13/19594	0.00772801	0.07379	0.0648156	GZMB/GNLY	2
CC	GO:0072687	meiotic spindle	2/203	14/19594	0.00895491	0.0811231	0.0712568	AURKA/ASPM	2
CC	GO:0031253	cell projection membrane	9/203	339/19594	0.00904413	0.0811231	0.0712568	LRP2/MAPT/PDZK1/S100P/SLC7A5/PSD3/MACF1/LAMP5/CYBRD1	9
CC	GO:0010369	chromocenter	2/203	15/19594	0.0102626	0.0893452	0.0784789	AURKB/CDCA8	2
CC	GO:0000152	nuclear ubiquitin ligase complex	3/203	45/19594	0.0112962	0.0955333	0.0839144	CDC20/UBE2C/UBE2S	3
MF	GO:0008017	microtubule binding	19/192	272/18410	7.13541e-11	3.27515e-08	3.00438e-08	BIRC5/CENPE/KIF11/KIFC1/MAPT/S100A8/S100A9/PRC1/KIF23/DLGAP5/KIF20A/TPX2/MACF1/KIF4A/NUSAP1/CCDC170/KIF18A/KIF18B/SKA1	19
MF	GO:0015631	tubulin binding	19/192	376/18410	1.56729e-08	3.59694e-06	3.29957e-06	BIRC5/CENPE/KIF11/KIFC1/MAPT/S100A8/S100A9/PRC1/KIF23/DLGAP5/KIF20A/TPX2/MACF1/KIF4A/NUSAP1/CCDC170/KIF18A/KIF18B/SKA1	19
MF	GO:0003777	microtubule motor activity	8/192	67/18410	4.66185e-07	6.73687e-05	6.1799e-05	CENPE/KIF11/KIFC1/KIF23/KIF20A/KIF4A/KIF18A/KIF18B	8
MF	GO:0008009	chemokine activity	7/192	49/18410	7.13414e-07	6.73687e-05	6.1799e-05	CXCL10/CXCL9/CCL8/CCL18/CXCL11/CXCL14/CXCL13	7
MF	GO:0042379	chemokine receptor binding	8/192	71/18410	7.33863e-07	6.73687e-05	6.1799e-05	CX3CR1/CXCL10/CXCL9/CCL8/CCL18/CXCL11/CXCL14/CXCL13	8
MF	GO:0003774	cytoskeletal motor activity	9/192	111/18410	2.44701e-06	0.000187197	0.00017172	CENPE/KIF11/KIFC1/MYH11/KIF23/KIF20A/KIF4A/KIF18A/KIF18B	9
MF	GO:0035173	histone kinase activity	4/192	16/18410	1.89173e-05	0.00124043	0.00113788	CDK1/CHEK1/AURKA/AURKB	4
MF	GO:0008574	plus-end-directed microtubule motor activity	4/192	17/18410	2.45366e-05	0.00140779	0.0012914	CENPE/KIF11/KIF18A/KIF18B	4
MF	GO:0045236	CXCR chemokine receptor binding	4/192	18/18410	3.12903e-05	0.0015958	0.00146387	CXCL10/CXCL9/CXCL11/CXCL13	4
MF	GO:0005201	extracellular matrix structural constituent	9/192	172/18410	8.24334e-05	0.00378369	0.00347088	COL16A1/COL17A1/COMP/MATN3/MFAP4/OGN/CILP/ADIPOQ/ASPN	9
MF	GO:0050786	RAGE receptor binding	3/192	10/18410	0.000126973	0.00529823	0.0048602	S100A7/S100A8/S100A9	3
MF	GO:0005125	cytokine activity	10/192	235/18410	0.000185122	0.00708093	0.00649552	BMP4/CXCL10/CXCL9/NDP/CCL8/CCL18/CXCL11/ADIPOQ/CXCL14/CXCL13	10
MF	GO:0001664	G protein-coupled receptor binding	11/192	288/18410	0.000227587	0.00803559	0.00737125	CX3CR1/CXCL10/CXCL9/NDP/CCL8/CCL18/CXCL11/MARCO/CXCL14/CXCL13/NMU	11
MF	GO:0036041	long-chain fatty acid binding	3/192	15/18410	0.000463262	0.0151884	0.0139327	FABP4/S100A8/S100A9	3
MF	GO:0003688	DNA replication origin binding	3/192	16/18410	0.000565803	0.0173136	0.0158822	MCM5/CDC45/MCM10	3
MF	GO:0048018	receptor ligand activity	14/192	489/18410	0.000635544	0.0182322	0.0167249	BMP4/GRP/CXCL10/CXCL9/NDP/NRTN/OGN/CCL8/CCL18/CXCL11/STC2/ADIPOQ/CXCL14/CXCL13	14
MF	GO:0030546	signaling receptor activator activity	14/192	496/18410	0.000729807	0.0197048	0.0180757	BMP4/GRP/CXCL10/CXCL9/NDP/NRTN/OGN/CCL8/CCL18/CXCL11/STC2/ADIPOQ/CXCL14/CXCL13	14
MF	GO:0003697	single-stranded DNA binding	6/192	120/18410	0.00162576	0.040678	0.037315	CRY2/MAPT/MCM5/CDC45/RAD51AP1/MCM10	6
MF	GO:0005504	fatty acid binding	4/192	49/18410	0.00168384	0.040678	0.037315	CRABP1/FABP4/S100A8/S100A9	4
MF	GO:0008201	heparin binding	7/192	168/18410	0.00193843	0.0444871	0.0408091	BMP4/COMP/CXCL10/CCL8/CXCL11/CCN5/CXCL13	7
MF	GO:0005126	cytokine receptor binding	9/192	272/18410	0.00227139	0.049646	0.0455416	CX3CR1/GATA3/CXCL10/CXCL9/CCL8/CCL18/CXCL11/CXCL14/CXCL13	9
MF	GO:0032395	MHC class II receptor activity	2/192	10/18410	0.00460832	0.0923518	0.0847167	HLA-DQA1/HLA-DQA2	2
MF	GO:0106310	protein serine kinase activity	10/192	360/18410	0.00462765	0.0923518	0.0847167	CDK1/CHEK1/NEK2/PCK1/AURKA/TTK/AURKB/MELK/STK32B/PBK	10
KEGG	hsa04110	Cell cycle	11/95	126/8164	1.98828e-07	4.17539e-05	3.97656e-05	CCNA2/CCNB1/CDK1/CDC20/CHEK1/MAD2L1/MCM5/TTK/CDC45/CCNB2/PTTG1	11
KEGG	hsa04114	Oocyte meiosis	10/95	131/8164	2.54975e-06	0.000267724	0.000254975	CCNB1/CDK1/CDC20/ITPR1/MAD2L1/PGR/AURKA/CCNB2/PTTG1/CALML5	10
KEGG	hsa04218	Cellular senescence	10/95	156/8164	1.21999e-05	0.000853996	0.000813329	CACNA1D/CCNA2/CCNB1/CDK1/CHEK1/FOXM1/ITPR1/MYBL2/CCNB2/CALML5	10
KEGG	hsa04061	Viral protein interaction with cytokine and cytokine receptor	8/95	100/8164	1.93153e-05	0.00101142	0.000963262	CX3CR1/CXCL10/CXCL9/CCL8/CCL18/CXCL11/CXCL14/CXCL13	8
KEGG	hsa03320	PPAR signaling pathway	7/95	75/8164	2.40815e-05	0.00101142	0.000963262	FABP4/HMGCS2/MMP1/PCK1/PLIN1/ADIPOQ/FADS2	7
KEGG	hsa04914	Progesterone-mediated oocyte maturation	7/95	102/8164	0.000173639	0.00607735	0.00578795	CCNA2/CCNB1/CDK1/MAD2L1/PGR/AURKA/CCNB2	7
KEGG	hsa05166	Human T-cell leukemia virus 1 infection	9/95	222/8164	0.00106761	0.0320284	0.0305033	CCNA2/CDC20/CHEK1/HLA-DQA1/HLA-DQA2/MAD2L1/IL1R2/CCNB2/PTTG1	9
KEGG	hsa04115	p53 signaling pathway	5/95	73/8164	0.00154432	0.0399649	0.0380618	CCNB1/CDK1/CHEK1/RRM2/CCNB2	5
KEGG	hsa04062	Chemokine signaling pathway	8/95	192/8164	0.00171278	0.0399649	0.0380618	CX3CR1/CXCL10/CXCL9/CCL8/CCL18/CXCL11/CXCL14/CXCL13	8
KEGG	hsa04060	Cytokine-cytokine receptor interaction	10/95	295/8164	0.00217554	0.0456864	0.0435108	BMP4/CX3CR1/CXCL10/CXCL9/CCL8/CCL18/CXCL11/IL1R2/CXCL14/CXCL13	10
KEGG	hsa04657	IL-17 signaling pathway	5/95	94/8164	0.00466185	0.0889989	0.0847609	CXCL10/MMP1/S100A7/S100A8/S100A9	5
