# Supplementary figures and images for: Identification and validation of PSMB7 as a novel biomarker for prognosis and immune infiltrates of lung adenocarcinoma
Source: PeerJ journal article supplement (doi:10.7717/peerj.19958), 2025-08-29

qPCR implementation conditions


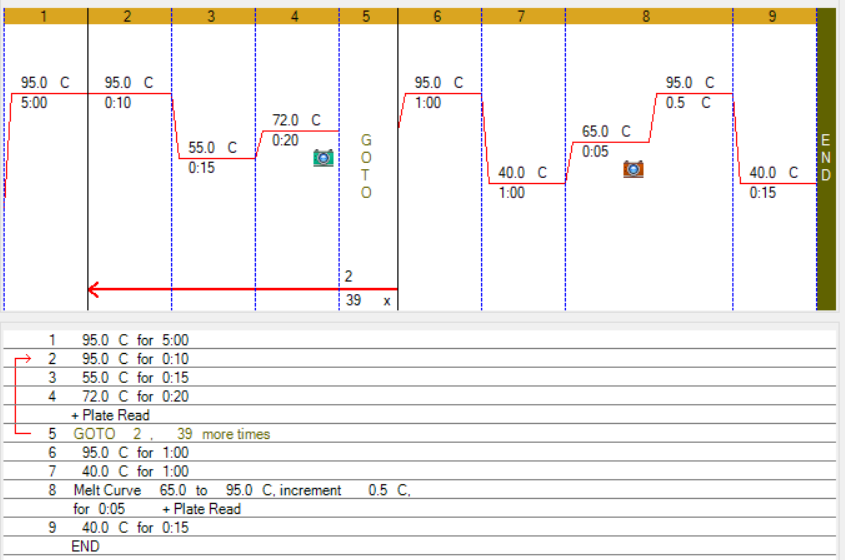


The first group of 4 samples.


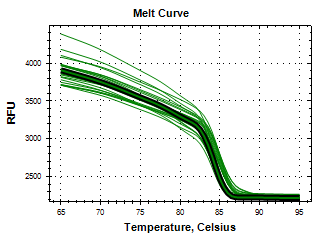

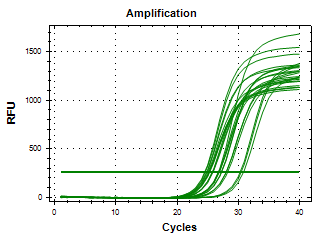

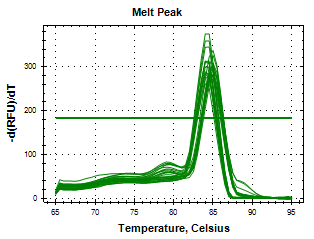


The second group of 8 samples.


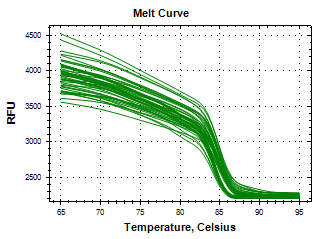

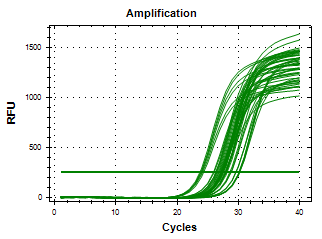

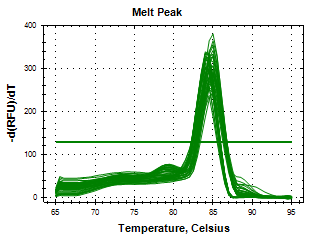

Supplement: Raw_data.zip [file RT-qpcr.docx]
